# Supplementary material for: De novo transcriptome assembly and annotation for gene discovery in avocado, macadamia and mango
Source: PubMed Central journal article supplement (PMC6949230; doi:10.1038/s41597-019-0350-9), 2020-01-08
Supplement: 41597_2019_350_MOESM1_ESM.pdf [file 41597_2019_350_MOESM1_ESM.pdf]

# BUSCO Assessment Results

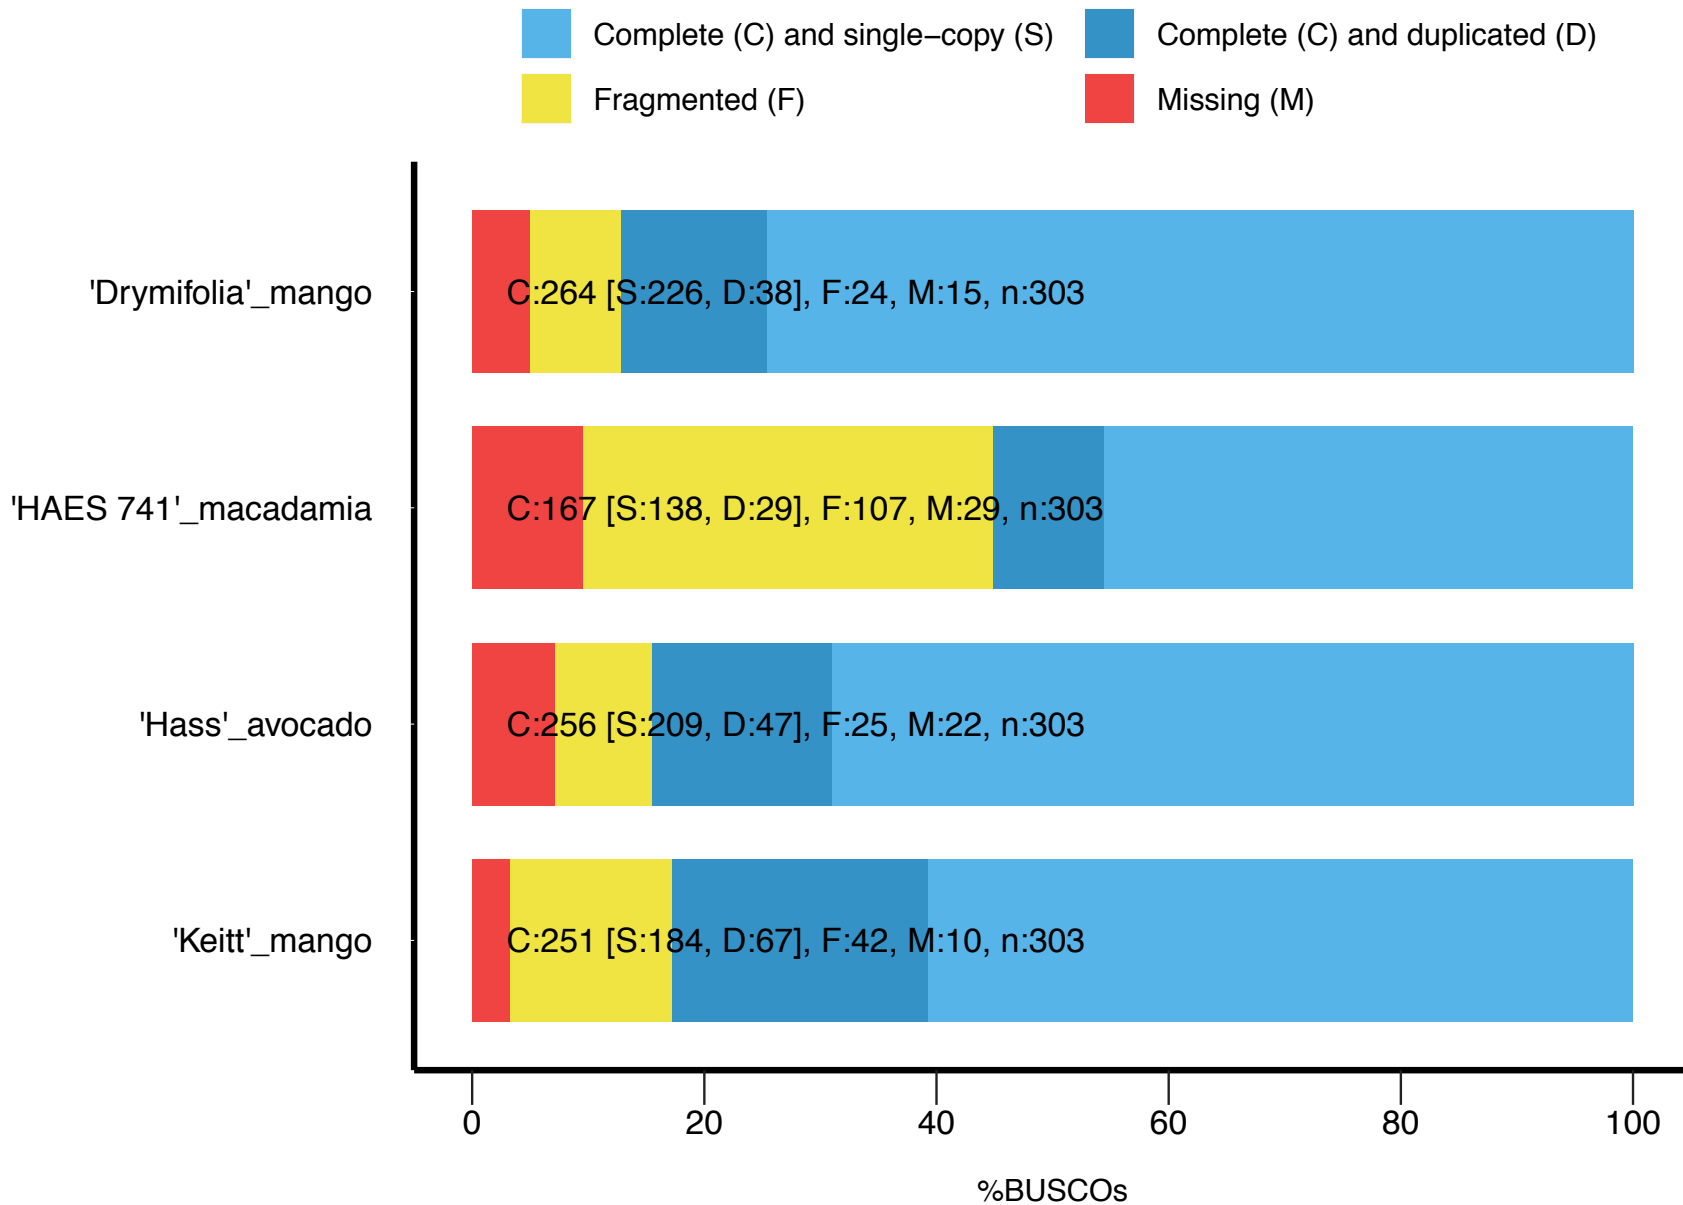

**Figure S1.** Sequence Assessment of the completeness of the reference 'Hass' and 'Drymifolia' avocado<sup>10</sup> and 'HAES 741' macadamia<sup>11</sup> protein-coding genes and 'Keitt' mango transcriptome assembly<sup>9</sup> by BUSCO.
